1 **Article type:** Research article

2 **Title:** Interdisciplinary perspectives on multimorbidity in Africa: developing an expanded  
3 conceptual model

4 **Authors:** Justin Dixon<sup>1,2\*#</sup>, Ben Morton<sup>3,4#</sup>, Misheck J. Nkhata<sup>5#</sup>, Alan Silman<sup>6#</sup>, Ibrahim G.  
5 Simiyu<sup>4#</sup>, Stephen A. Spencer<sup>3,4#</sup>, Myrna Van Pinxteren<sup>7#</sup>, Christopher Bunn<sup>8,9†</sup>, Claire  
6 Calderwood<sup>1,10†</sup>, Clare I.R. Chandler<sup>2†</sup>, Edith Chikumbu<sup>8†</sup>, Amelia C. Crampin<sup>8,11,12†</sup>, John R.  
7 Hurst<sup>13†</sup>, Modou Jobe<sup>14†</sup>, Andre Pascal Kengne<sup>15†</sup>, Naomi S. Levitt<sup>7†</sup>, Mosa Moshabela<sup>16†</sup>,  
8 Mayowa Owolabi<sup>17†</sup>, Nasheeta Peer<sup>15†</sup>, Nozgechi Phiri<sup>8†</sup>, Sally J. Singh<sup>18†</sup>, Tsaone Tamuhla<sup>19†</sup>,  
9 Mandikudza Tembo<sup>1,10†</sup>, Nicki Tiffin<sup>19†</sup>, Eve Worrall<sup>20†</sup>, Nateiya M. Yongolo<sup>4,21†</sup>, Gift T.  
10 Banda<sup>3,4‡</sup>, Fanuel Bickton<sup>3,22‡</sup>, Abbi-Monique Mamani Bilungula<sup>23‡</sup>, Edna Bosire<sup>24,25‡</sup>, Marlen  
11 Stacy Chawani<sup>3,26‡</sup>, Beatrice Chinoko<sup>3‡</sup>, Mphatso Chisala<sup>8‡</sup>, Jonathan Chiwanda<sup>27‡</sup>, Sarah  
12 Drew<sup>28‡</sup>, Lindsay Farrant<sup>29‡</sup>, Rashida A. Ferrand<sup>1,10‡</sup>, Mtisunge Gondwe<sup>3,4‡</sup>, Celia L.  
13 Gregson<sup>1,28‡</sup>, Richard Harding<sup>30‡</sup>, Dan Kajungu<sup>31‡</sup>, Stephen Kasenda<sup>8‡</sup>, Wincelous Katagira<sup>32‡</sup>,  
14 Duncan Kwaitana<sup>33‡</sup>, Emily Mendenhall<sup>34‡</sup>, Adwoa Bemah Boamah Mensah<sup>35‡</sup>, Modai  
15 Mnenula<sup>36‡</sup>, Lovemore Mupaza<sup>37‡</sup>, Maud Mwakasungula<sup>38‡</sup>, Wisdom Nakanga<sup>8,39‡</sup>, Chiratidzo  
16 Ndhlovu<sup>40‡</sup>, Kennedy Nkhoma<sup>30‡</sup>, Owen Nkoka<sup>8,9‡</sup>, Edwina Addo Opare-Lokko<sup>41‡</sup>, Jacob  
17 Phulusa<sup>3‡</sup>, Alison Price<sup>8,11‡</sup>, Jamie Rylance<sup>2‡</sup>, Charity Salima<sup>42‡</sup>, Sangwani Salimu<sup>3,4‡</sup>, Joachim  
18 Sturmberg<sup>43,44‡</sup>, Elizabeth Vale<sup>45‡</sup> and Felix Limbani<sup>3\*</sup>

19 #Equally contributing first authors, listed alphabetically

20 †Equally contributing article working group, listed alphabetically

21 ‡Equally contributing workshop collaborator group, listed alphabetically

22

23 **Affiliations:**

24 1. The Health Research Unit Zimbabwe, Biomedical Research and Training Institute, Harare,  
25 Zimbabwe

**NOTE:** This preprint reports new research that has not been certified by peer review and should not be used to guide clinical practice.

- 26 2. Department of Global Health and Development, London School of Hygiene and Tropical  
27 Medicine, London, UK
- 28 3. Malawi-Liverpool-Wellcome Programme, Chichiri 3, Blantyre, Malawi
- 29 4. Department of Clinical Sciences, Liverpool School of Tropical Medicine, Liverpool, UK
- 30 5. SHLS Nursing and Midwifery, Teesside University, Middlesborough, UK
- 31 6. Nuffield Department of Orthopaedics, Rheumatology and Musculoskeletal Sciences, Oxford  
32 University, Oxford, UK
- 33 7. Department of Medicine and Chronic Disease Initiative for Africa, Faculty of Health  
34 Sciences, University of Cape Town, Cape Town, South Africa
- 35 8. Malawi Epidemiology and Intervention Research Unit, Lilongwe, Malawi
- 36 9. College of Social Sciences, University of Glasgow, Glasgow, Scotland, UK
- 37 10. Department of Clinical Research, London School of Hygiene & Tropical Medicine,  
38 London, UK
- 39 11. Department of Population Health, London School of Hygiene & Tropical Medicine,  
40 London, UK
- 41 12. School of Health and Wellbeing, University of Glasgow, Glasgow, UK
- 42 13. UCL Respiratory, University College London, London, UK
- 43 14. MRC Unit The Gambia at LSHTM, Banjul, The Gambia
- 44 15. Non-communicable Diseases Research Unit, South African Medical Research Council,  
45 Cape Town and Durban, South Africa
- 46 16. School of Nursing and Public Health, University of KwaZulu-Natal, Durban, South Africa
- 47 17. Centre for Genomic and Precision Medicine, University of Ibadan, Ibadan, Nigeria
- 48 18. Department of Respiratory Sciences, University of Leicester, Leicester, UK
- 49 19. South African National Bioinformatics Institute, University of the Western Cape, Cape  
50 Town, South Africa

- 51 20. Department of Vector Biology, Liverpool School of Tropical Medicine, Liverpool, UK
- 52 21. Kilimanjaro Clinical Research Institute, Moshi, Tanzania
- 53 22. Department of Rehabilitation Sciences, The Kamuzu University of Health Sciences,  
54 Blantyre, Malawi
- 55 23. Department of Physical Medicine and Rehabilitation, University of Kinshasa, Kinshasa,  
56 Democratic Republic of Congo
- 57 24. Brain and Mind Institute, Aga Khan University, Nairobi, Kenya
- 58 25. SAMRC Developmental Pathways for Health Research Unit, University of the  
59 Witwatersrand, Johannesburg, South Africa
- 60 26. Health Economics and Policy Unit, The Kamuzu University of Health Sciences, Blantyre,  
61 Malawi
- 62 27. Department of Non-communicable Diseases, Ministry of Health, Lilongwe, Malawi
- 63 28. Musculoskeletal Research Unit, Translational Health Sciences, Bristol Medical School,  
64 University of Bristol, Bristol, UK
- 65 29. School of Public Health and Family Medicine, Faculty of Health Sciences, University of  
66 Cape Town, Cape Town, South Africa
- 67 30. Cicely Saunders Institute, Florence Nightingale Faculty of Nursing Midwifery and  
68 Palliative Care, King's College London, London, UK
- 69 31. Makerere University Centre for Health and Population Research, Makerere University,  
70 Kampala, Uganda
- 71 32. Makerere Lung Institute, Makerere University, Kampala, Uganda
- 72 33. Department of Family Medicine, The Kamuzu University of Health Sciences, Blantyre,  
73 Malawi
- 74 34. Edmund A. Walsh School of Foreign Service, Georgetown University, Washington, DC,  
75 USA

76 35. Department of Nursing, College of Health Sciences, Kwame Nkrumah University of  
77 Science and Technology, Kumasi, Ghana

78 36. College of Medicine, University of Malawi, Blantyre, Malawi

79 37. Island Hospice and Healthcare, Harare, Zimbabwe

80 38. Malawi NCD Alliance, Malawi

81 39. Deanery of Clinical Sciences, College of Medicine and Veterinary Medicine, University of  
82 Edinburgh, Edinburgh, UK

83 40. Internal Medicine Unit, Faculty of Medicine and Health Sciences, University of Zimbabwe,  
84 Harare, Zimbabwe

85 41. Greater Accra Regional Hospital, Faculty of Family Medicine, Ghana College of  
86 Physicians and Surgeons, Accra, Ghana

87 42. Achikondi Women and Community Friendly Health Services, Lilongwe, Malawi

88 43. School of Medicine and Public Health, Faculty of Health and Medicine, University of  
89 Newcastle, Newcastle, Australia

90 44. Foundation President of the International Society of Systems and Complexity Sciences for  
91 Health

92 45. University of the Witwatersrand, Johannesburg, South Africa

93

94 **\*Correspondence to:**

95 Justin Dixon

96 Department of Global Health and Development, London School of Hygiene and Tropical  
97 Medicine, 15-17 Tavistock Place, Kings Cross, London WC1H 9SH, United Kingdom

98 Email: [justin.dixon@lshtm.ac.uk](mailto:justin.dixon@lshtm.ac.uk)

99

100 Felix Limbani

101 Malawi-Liverpool-Wellcome Programme, Blantyre 3, PO Box 30096, Malawi

102 Email: [flimbani@mlw.mw](mailto:flimbani@mlw.mw)

103

104 **Keywords:** Multimorbidity, sub-Saharan Africa, global health, interdisciplinarity

105 **Word count:** 5,976 words

106 **Abstract:** 210 words

107 **References:** 42

108 **Tables and Figures:** Tables: 1, Boxes: 3, Figures: 2

109 **Supplement Tables:** 3

110

111

112

113

114

115

116

117

118

119

120

121

## 122 **Abstract**

123 Multimorbidity is an emerging challenge for healthcare systems globally. It is commonly  
124 defined as the co-occurrence of two or more chronic conditions in one person, but the suitability  
125 and utility of this concept beyond high-income settings is uncertain. This article presents the  
126 findings from an interdisciplinary research initiative that drew together 60 academic and  
127 applied partners working in 10 African countries to critically consider existing concepts and  
128 definitions of multimorbidity, to evaluate their utility and limitations, and to co-develop an  
129 context-sensitive, interdisciplinary conceptual framing. This iterative process was guided by  
130 the principles of grounded theory and involved focus- and whole-group discussions during a  
131 three-day concept-building workshop, thematic coding of workshop discussions, and further  
132 post-workshop iterative development and refinement. The three main thematic domains that  
133 emerged from workshop discussions were: the disease-centricity of current concepts and  
134 definitions; the need to foreground what matters to people living with multimorbidity  
135 (PLWMM), families, and other stakeholders; and the need for conceptual breadth and  
136 flexibility to accommodate the contributions of multiple disciplinary perspectives and  
137 heterogeneity within and between different African countries. These themes fed into the  
138 development of an expanded conceptual model that centres the catastrophic impacts  
139 multimorbidity often has for PLWMM, their families and support structures, for service  
140 providers, and for resource-constrained healthcare systems.

141

## 142 **Introduction**

143 Multimorbidity – commonly defined as the presence of two or more chronic conditions in one  
144 person (1) – has been the focus of increasing attention over the last decade. While the bodies  
145 of literature were initially weighted towards high-income countries (HICs), multimorbidity has  
146 more recently been recognised as a global health challenge that may be especially detrimental

147 in low- and middle-income countries (LMICs).(2–5) The health systems of many LMICs,  
148 including in Africa are donor-dependent, organised around single diseases, predominantly the  
149 infectious diseases including HIV and tuberculosis (TB) and, despite rapid rises in non-  
150 communicable disease (NCD) prevalence, have limited funding for these conditions.(3) This  
151 has led to a disparity in quality of care for people with NCDs and a failure to adequately  
152 integrate NCD care into programmes for people with chronic infectious diseases.(6)

153

154 An initiative facilitated by the UK Academy of Medical Sciences set high-level priorities for  
155 responding to multimorbidity in a global context.(2) and, in collaboration with the Academy  
156 of Sciences of South Africa, for sub-Saharan Africa specifically(7). Priorities include research  
157 into the patterning, burden, and determinants of disease ‘clusters’;(8–11) improving prevention  
158 and treatment of multimorbidity;(12,13) and the development of upstream health systems  
159 interventions and care models to better respond to the needs of people living with  
160 multimorbidity (PLWMM).(14,15) With current concepts and models of multimorbidity  
161 disproportionately based on biomedical research in the global North,(15) these initiatives  
162 emphasise the need for a more equitable, Southern-led response, facilitated by changes within  
163 the research ecosystem(2,7). This includes the development of South-South and North-South  
164 partnerships; cross-disciplinary and cross-sectoral collaborations;(7) and the inclusion of a  
165 greater range of perspectives – including those of the social sciences, PLWMM and affected  
166 communities, and frontline health workers – to co-develop more effective, equitable and  
167 context-sensitive interventions.(5,7)

168

169 Multimorbidity is currently challenging academics and practitioners working across Africa to  
170 step beyond entrenched disciplinary and disease ‘siloes’.(16) However, multimorbidity  
171 continues to mean different things to different stakeholder groups, reflecting the diversity of

172 disciplines, perspectives, methods, measurement instruments, and geographic vantage points  
173 from which they enter this emerging field. Indeed, despite its apparent simplicity and  
174 widespread use, the definition of multimorbidity as ‘two or more chronic conditions’ endorsed  
175 by the WHO(1) and Academy of Medical Sciences(2) is not only contested but has also been  
176 heterogeneously interpreted in terms of which condition combinations ‘count’ as  
177 multimorbidity.(17,18) Consequently, it remains challenging to compare multimorbidity  
178 across datasets, to communicate across disciplines, and more broadly to ensure a coordinated  
179 response within and between African countries and regions. As commentators have noted, the  
180 multimorbidity conversation has become preoccupied with the promise of a universal  
181 definition, assumed to be a prerequisite for action, but has yielded poor returns.(19) Others  
182 have argued that the power of multimorbidity may lie precisely in its resistance to being pinned  
183 down to a number or specification of conditions, forcing us instead to consider the whole  
184 person in context.(16) This is a compelling proposition, one that speaks to the promise  
185 commonly pinned to multimorbidity for delivering on aspirations for holistic, person-centred  
186 care.(20) Yet without a common lexicon that enables communication across different  
187 disciplines, we may miss the opportunity to build on the current momentum building around  
188 multimorbidity to maximise benefits to patients and their carers across geographies, incomes  
189 and societal structures.

190

191 Responding to this need, this article presents the findings and outcomes from an  
192 interdisciplinary research initiative to interrogate the conceptual underpinnings of  
193 multimorbidity research and care in Africa. Grounded in a concept-building workshop in  
194 Blantyre, Malawi, the aim was to critically explore current definitions and concepts of  
195 multimorbidity; to critically appraise their potential, limitations, and utility; and to work  
196 towards a common conceptual model sensitive to the particularities and heterogeneity of



197 African contexts. By folding a wide range of disciplinary perspectives, concerns, and interests  
198 into a common framework, the resultant multimorbidity model can, we contend, underpin and  
199 orient the cross-disciplinary, Southern-led response that, as described above, will be crucial to  
200 realize holistic, person-centred, and context-specific care for PLWMM.

201

## 202 **Methods**

### 203 *Research Design*

204 We used an inductive, co-productive research design. Guided by the principles of grounded  
205 theory,(21) the research process involved a three-day concept-building workshop in Blantyre,  
206 Malawi (June 22-24, 2022),(22) thematic ‘open coding’ of workshop discussions, and further  
207 iterative development of a conceptual model following the workshop. Our approach follows  
208 the growing interest in “collective experimentation”(23) to address issues of transdisciplinary  
209 concern in public and global health,(23–25) of which multimorbidity is arguably a  
210 paradigmatic example.

211

### 212 *Participants and Sampling*

213 The workshop organising committee comprised an interdisciplinary group of public health  
214 researchers, clinicians, and social scientists (EB, CIRC, JD, RAF, FL, EM, BM). Potential  
215 participants were identified through purposive and snowballing methods between June 2021-  
216 March 2022, which are described in greater detail elsewhere.(22) The collaborator group drew  
217 together 60 researchers, clinicians, health planners, and policymakers (HIC-based n=19,  
218 LMIC-based (n=41), together representing a wide range of disciplinary perspectives, including  
219 from (sub-)fields of epidemiology, public health, clinical medicine, and the social sciences  
220 ([Figure 1](#)). Given the current concentration of multimorbidity research, and the location of the  
221 workshop in Malawi, the regional expertise among the collaborator group stemmed primarily

222 from countries within Southern Africa, with the greatest concentration of experience from  
223 Malawi (n=33), South Africa (n=13), and Zimbabwe (n=9). Participants, several of whom were  
224 working across multiple countries, also brought experience from Central, Eastern, and Western  
225 Africa, together representing experience from 10 African countries ([Figure 1](#)). For practical  
226 and ethical reasons, we did not directly include PLWMM in the workshop; however, we asked  
227 collaborators, including social scientists and civil society and community representatives  
228 present, to represent learnings from their interactions to give an understanding of different  
229 patient perspectives. A detailed breakdown of participants' institutional location, disciplinary  
230 and regional expertise, gender, and career stage, and a reflexivity statement detailing the  
231 measures taken to promote equitable partnership within this collaboration is provided in the  
232 [Supplementary Material](#).(26)

233 [Insert Figure 1]

234

### 235 **Figure 1. Regional and disciplinary expertise represented by workshop participants**

236

#### 237 *Workshop design*

238 A detailed account of the workshop design is published elsewhere.(22) The workshop was  
239 designed to optimise opportunities for cross-disciplinary discussion. Sessions were organised  
240 around four provisional thematic 'domains': (1) concepts and framings of multimorbidity; (2)  
241 population-level health data; (3) risk, prevention, and sites of intervention; (4) health systems  
242 and care models. Each session began with an 'ignition' talk which outlined current knowledge,  
243 gaps, and key questions within each domain. These questions were then addressed by  
244 participants through a combination of smaller focus groups aided by flip charts and plenary  
245 discussion. In a final session, reviewed and summarised the workshop sessions in plenary,  
246 collectively identifying core and cross-cutting themes, before breaking into working groups

247 which advanced agreed themes for further development. This article was led by working group  
248 focused on developing a common concept of multimorbidity.

249

### 250 *Analytical framework*

251 This research was guided by the principles of constructivist grounded theory, which holds that  
252 there is no ‘right or wrong’ and that emergent concepts and grounded theories are interpretive  
253 descriptions rather than an ‘objective’ account of reality.(21) Accordingly, the assumption  
254 underlying the workshop was that there is no privileged disciplinary vantage point from which  
255 to conceptualise or frame multimorbidity. Rather, different concepts and understandings  
256 foreground different aspects of the challenge multimorbidity presents for current systems, tied  
257 to particular knowledge bases, while potentially backgrounding others. This position, which  
258 was emphasised throughout the workshop and sustained through the post-workshop concept  
259 development, encouraged a diversity of concepts and understandings to be put into  
260 conversation, some of which diverged from and exposed the limits of the prevailing biomedical  
261 model. At the same time, in embracing difference, we were also able to find synergies and  
262 shared commitments. The embrace of both diversity and commonality formed the basis of  
263 developing a more cross-cutting, holistic, and ultimately more useful understanding of  
264 multimorbidity as it relates to African contexts.

265

### 266 *Data analysis*

267 As this was an iterative, co-productive process, there was no rigid distinction between the  
268 process of ‘data collection’ and ‘analysis’.(21) All participants in the workshop engaged in  
269 critical analysis, many formed part of the core writing group, and all are recognised as authors.  
270 Source material for analysis included detailed notes of proceedings, including both focus  
271 groups and plenary discussions, taken by a team of rapporteurs (GTB, SS, IGS, SAS, NMY).

272 Where necessary, the rapporteurs went back to individuals for clarification, which were  
273 absorbed into their notes; all notes were collated and reconciled to produce a unified account  
274 of workshop proceedings. Also included for analysis were the flip chart pages composed used  
275 during focus groups and the Microsoft Word documents produced using a shared screen during  
276 plenary discussion. A working group subsequently engaged in thematic open coding(27) of  
277 source documents on a shared drive to identify themes relating to the conceptualisation and  
278 framing of multimorbidity. Through regular analysis meetings, the working group iteratively  
279 worked towards themes of progressively higher orders of abstraction. The highest level of these  
280 themes, which we describe in the results section, were then fed into the development of an  
281 expanded model of multimorbidity. Refining this model was itself an iterative process,  
282 involving several iterations each of which was shared with the wider collaborator group along  
283 with the draft manuscript for further comment, discussion, and refinement.

284

### 285 *Research ethics*

286 Due to the collaborative research design employed, in which all investigators were participants  
287 and vice versa, and all are named co-authors, formal ethical review was not required for this  
288 research. This follows recent examples adopting similar co-productive research models to  
289 develop cross-disciplinary frameworks and agendas.(24,28) All participants provided either  
290 verbal consent or written email consent to taking part in the concept-building workshop, which  
291 was captured using an Excel spreadsheet. At the end of the workshop, participants jointly  
292 agreed upon research outputs and working groups to take forward prominent themes from the  
293 discussions, and all consented to being named as co-authors on this particular output. All  
294 participants have reviewed the contents of the manuscript and have approved its final version.  
295 The concept-building workshop was subject to the safeguarding mechanisms of the host  
296 organisation (Malawi-Liverpool-Wellcome Programme), which included anonymous reporting

297 procedures. We have not made available the detailed rapporteur notes as these would reveal  
298 the input of specific contributors. A detailed account of workshop proceedings, ratified and co-  
299 authored by all participants, has been published elsewhere.(22)

300

## 301 **Results**

302 Three overarching themes that represent the group's shared commitments for an African-  
303 context-sensitive conceptualisation of multimorbidity emerged: (1) the disease-centricity of  
304 prevailing concepts and definitions; (2) that models of multimorbidity need to be grounded in  
305 the realities and needs of PLWMM, families, and social networks; (3) the need for flexibility  
306 in defining multimorbidity for multimorbidity to be fit for purpose. These themes and their  
307 constituent sub-themes are summarised in Table 1.

308 **Table 1. Key themes and sub-themes for conceptualising multimorbidity**

| Theme                                                                                          | Sub-Themes                                                                                                                                                                                                                                                                                                                                                                                                                                                                                                                                 |
|------------------------------------------------------------------------------------------------|--------------------------------------------------------------------------------------------------------------------------------------------------------------------------------------------------------------------------------------------------------------------------------------------------------------------------------------------------------------------------------------------------------------------------------------------------------------------------------------------------------------------------------------------|
| Disease-centricity of current models of multimorbidity                                         | <ul style="list-style-type: none"><li>• In medicine and global health, patients are defined by their diseases</li><li>• The minimalist definition of multimorbidity as two or more long-term conditions promotes a disease-centric view</li><li>• This definition also promotes narrow consideration of social factors associated with multimorbidity centred on individual behaviour and lifestyle factors</li><li>• Interventions working with this definition may continue to reinforce or exacerbate the status quo</li></ul>          |
| Need to foreground what matters to PLWMM – their priorities, needs, and social context         | <ul style="list-style-type: none"><li>• Benefit of focusing less on the disease categories within multimorbidity and more on its common consequences for PLWMM and associated needs</li><li>• The burden of multimorbidity on families, informal carers, and social networks is crucial to consider in many African contexts</li><li>• Need for a broader appreciation of the social, structural, and environmental context of multimorbidity</li><li>• Fragmented, disease-driven systems compound the burden of multimorbidity</li></ul> |
| Conceptual breadth and flexibility is needed for multimorbidity to be cross-cutting and useful | <ul style="list-style-type: none"><li>• A standard, one-size-fits-all definition not a panacea for multimorbidity</li><li>• Multimorbidity may mean different things, carry different priorities, and be more or less useful in different contexts and at different levels of scale</li><li>• A broad, flexible understanding that recognises multiple perspectives is needed to be cross-cutting and useful</li></ul>                                                                                                                     |

309 ***Theme 1: Disease-centricity of current concepts***

310 Across the countries represented at the workshop, a key challenge expressed by participants  
311 was that populations are living longer and facing increasingly complex disease burdens. Yet,  
312 health systems remain built around siloes of expertise based on single diseases. ‘Siloed’  
313 approaches were observed to be perpetuated by ‘vertical’ funding models adopted by Northern  
314 donors, who have long prioritised acute diseases and chronic infectious diseases, notably HIV  
315 and TB (Box 1a). The single-disease approach, it was observed, drives many aspects of health  
316 systems from health policy and planning, to research and surveillance, to training and care  
317 delivery. It is central to the way health systems performance is monitored and evaluated and,  
318 in turn, why single disease care, especially care for those conditions prioritised by donors,  
319 continues to receive the majority of resources (Box 1b). Disease-centred thinking is so  
320 embedded that it is extremely challenging to step beyond this frame of reference; our systems  
321 seem to inevitably pull us back to a focus on diseases (Box 1c). As a result of the fragmentation  
322 of systems built around particular diseases, many areas of health including NCD and mental  
323 health are under-funded. Moreover, the needs of PLWMM are rarely considered within current  
324 systems. This is with the exception of integration of healthcare services for common  
325 comorbidities associated with HIV in some settings.

326

327 Throughout the workshop, participants grappled with the tension that, on the one hand,  
328 multimorbidity foregrounds disease concentrations and interactions rather than diseases in  
329 isolation. This makes it a potentially powerful concept for re-aligning priorities with the  
330 increasingly complex disease burdens affecting many African countries, including the colliding  
331 epidemic of communicable diseases and NCDs. On the other hand, the concept of  
332 multimorbidity, participants noted, is generally that of a compound disease category, most  
333 commonly defined as the presence or absence of two-or-more chronic conditions. As a result,

334 it is still a disease-centred concept. Participants therefore questioned whether this definition  
335 was suited for moving us from a scenario in which people are defined by their diseases, to what  
336 was often referred to as a more ‘person-centred’ approach (Box 1d and 1e). Concerns raised  
337 about a disease-centred lens included that this may promote an overly simplistic, additive view  
338 of multimorbidity as the sum of interacting (but ultimately discrete) disease conditions. A  
339 related concern was the danger of emphasising the ‘communicability’ versus ‘non-  
340 communicability’ of diseases within multimorbidity. Continuing to reinforce this distinction  
341 within multimorbidity, it was noted, can perpetuate the tendency to reduce the social context  
342 of risk to ‘modifiable lifestyle factors’, a phenomenon that is particularly prominent in the  
343 context of NCDs (i.e., smoking, poor diet, sedentism, and substance abuse). As several  
344 participants noted, targeting individual behaviour and lifestyles does not amount to a ‘person-  
345 centred’ approach and may lead to patient shaming and stigmatisation (Box 1f), whilst  
346 deemphasising structural factors such as chronic poverty that constrain people’s life ‘choices’  
347 and behaviours.

**Box 1. Illustrative excerpts and quotes**

- a. “Most of the chronic diseases in sub-Saharan Africa countries such as HIV and TB are managed through vertical programs, which inhibits care for multimorbidity” (Session 1, plenary, rapporteur notes)
- b. “The disease-centric outcomes that drive healthcare systems currently would need to be overhauled in order to respond to multimorbidity.” (Session 5, plenary, rapporteur notes)
- c. “The challenge is that the system we work in does not accommodate a transformation in thinking; it keeps bringing us back to a focus on diseases” (Session 1, plenary, rapporteur notes)
- d. “The definition of two or more conditions may have limitations, and may continue to perpetuate a disease specific approach” (Session 5, plenary, Word document on shared screen)
- e. “We are still using a disease-focused lens to define multimorbidity – tensions versus a person-centred approach” (Session 5, group 5, flip chart excerpt)
- f. “Labelling some of the non-communicable conditions related to multimorbidity, such as hypertension and diabetes, as ‘lifestyle diseases’ creates stigma and shaming” (Session 3, group 2, rapporteur notes)

349

350 ***Theme 2: Need to foreground PLWMM's priorities, needs, and social context***

351 Continuous with theme 1, a particular concern expressed with the disease-based definition of  
352 multimorbidity is that it also fails to capture what *matters* to PLWMM. Several points about  
353 patients' needs and priorities were highlighted. First, a concern voiced particularly by clinicians  
354 was that it often matters far less to people what the diagnoses and their causes are than their  
355 consequences and impacts, which become especially complex when it comes to secondary  
356 complications. Symptom and treatment burden, functionality, and quality of life were  
357 highlighted as important to fold into our understanding of multimorbidity (Box 2a), but it was  
358 noted that these are rarely considered within current disease-centred management approaches  
359 (Box 2b). While there may be considerable heterogeneity in the lived experience of  
360 multimorbidity across different condition combinations, it was also observed that the  
361 symptoms, needs and treatment burdens of PLWMM are often not disease-specific and may  
362 share similar profiles. Tellingly, when it was put to a vote whether the concept of  
363 multimorbidity should draw a distinction between 'communicable' and 'non-communicable'  
364 diseases, a significant majority said it should not. Participants were not suggesting that we  
365 cease thinking about causes and determinants of multimorbidity, which remain important  
366 especially within epidemiology, public health, and clinical medicine, but rather that we ground  
367 our concept of multimorbidity in the experiences and priorities of PLWMM.

368

369 Second, participants stressed that when considering the impacts of multimorbidity in many  
370 African contexts, it is vital to expand the focus beyond the affected person to the pivotal role  
371 that families, informal caregivers and larger support networks play in navigating burdens of  
372 illness and treatment and in PLWMM's ability to 'self'-manage (Box 2c). Accordantly, it was  
373 argued that while person-centred care is important, we need to be talking about *family*-centred



374 care in this setting (Box 2d). A related consideration when designing multimorbidity care  
375 models for African health systems is not to ignore current social realities such as medical  
376 pluralism and the existing role of traditional healers. In the absence of such recognition, care  
377 models risk recreating Northern global health policies which fail to account for local  
378 experiences and African-centred knowledge systems and values.

379

380 Third, widening the lens further still, participants stressed that social, structural and  
381 environmental factors are crucial for understanding the patterning, impacts, and experience of  
382 multimorbidity. The concept of syndemics was recognised as a useful and well-established  
383 theoretical framework for capturing the bio-social causes and consequences of multimorbidity  
384 and how health and social challenges noxiously intersect (Box 2e). Social scientists reported  
385 from qualitative research that daily socio-economic struggles preceded and exacerbated bodily  
386 ailments and symptoms, and that within such fragile arrangements, interruptions to or changes  
387 in circumstance could have huge impacts on overall ability to cope, as was recently evidenced  
388 during the COVID-19 pandemic. Examples were given from different settings about the  
389 challenges PLWMM face: reaching secondary and tertiary health care when residing in rural  
390 areas; struggling to mobilise funds to spend on treatment and transport; and losing income  
391 when spending time at the clinic or balancing medical appointments with family  
392 responsibilities. It was further observed that specialised care organised around single diseases  
393 compounds the burden placed on those living with multimorbidity: it shapes which diseases  
394 are diagnosed and prioritised, the time and resources that are needed to (self-)manage different  
395 conditions, and the added care burden on families and carers (Box 2f and 2g).

396

397

398

399  
400  
401  
402  
403  
404  
405  
406  
407  
408  
409  
410  
411

**Box 2. Illustrative excerpts and quotes**

- a. “The label of multimorbidity is likely to be useful if it includes burden and function, for instance pain, disability, and sleep” (Session 1, group 1, rapporteur notes)
- b. “Clinics rarely account for patient preferences and needs. A patient-centred approach is where health care consciously works around patients’ needs, responding to individual preferences and trying to ensure that patient values guide clinical decisions.” (Session 4, ignition talk, rapporteur notes)
- c. “Family members/community are very important for patients' improvement because they have an influence on the treatment given, in the same way that nutrition post-delivery is mostly influenced by relatives” (Session 1, group 3, rapporteur notes)
- d. “We need to think about family centred care – patient-centred care is important, but there is also a family who has to be involved in the process” (Session 5, plenary discussion, Word document on shared screen)
- e. “Social determinants of health are important – syndemics, the commercial determinants of health, and others. For example, for TB patients, food insecurity, biological predisposition, and access to care have been used to identify patients/potential patients with multimorbidity” (Session 3, group 2, rapporteur notes)
- f. “Most care in urban areas is specialized. This leads to fragmentation, adding a burden to the family and caretakers” (Session 1, group 3, rapporteur notes)
- g. “Individual disease treatment compounds the burden. Patients start prioritising certain conditions and some may go untreated” (Session 1, group 2, rapporteur notes)

412  
413  
414  
415  
416  
417  
418  
419  
420  
421  
422  
423

***Theme 3: Conceptual breadth and flexibility***

The third theme was that, if context is taken seriously, a one-size-fits-all definition of multimorbidity trying to pin down multimorbidity to a specific number or combination of conditions is neither possible nor desirable (Box 3a). The diversity of academic and applied perspectives present at the workshop underscored how counterproductive, even harmful, a narrow definition favouring one discipline or perspective can be. The concept, it was agreed, needs to remain broad, flexible, and able to foreground different things depending on the question being asked, the problem or perspective driving the question, the geographical, epidemiological, and health system context, and indeed the level of scale. Depending on the context, multiple definitions may be needed (Box 3b).

424 Participants considered the utility of multimorbidity to different disciplinary and stakeholder  
425 groups, and how the priorities might shift in different contexts. As highlighted in Theme 2, the  
426 primary concern at the clinical and community level is functionality, quality of life, and the  
427 burden and complexity shouldered by PLWMM, their family and social networks (Box 3c).  
428 Public health researchers, while similarly recognising the need for greater emphasis on function  
429 and quality of life, were often more focused on the societal impact of multimorbidity, for which  
430 well-defined (though not necessarily disease-centric) measures are needed to facilitate  
431 comparison across datasets and to enable identification of patterns, trends, and burden (Box  
432 3d). For policymakers and health planners, also deploying multimorbidity at the population  
433 level, the concept was viewed as useful for reconfiguring funding streams (e.g., from ‘vertical’  
434 to ‘horizontal’ models), for developing new care delivery models (e.g., from disease- to person-  
435 and family-centred care), for training and deploying the health workforce, and managing risks  
436 among the population. Social scientists and historians pushed for an expansive concept, one  
437 connecting the intricacies of lived experience to the ‘upstream’ structural and systemic factors  
438 that socially pattern multimorbidity and exacerbate the burden (Box 3e). Finally, while  
439 PLWMM were not represented directly, the group noted that multimorbidity was unlikely to  
440 translate well into lay models (Box 3f), and that in fact this label could be harmful and  
441 stigmatising (Box 1f). Because of these different concerns, we may need to foreground (and  
442 background) different aspects of multimorbidity, and recognise scenarios when it is not useful,  
443 to maximise its potential and minimise its harms (Box 3g).

444

445 While recognising the impossibility of a narrow one-size-fits-all definition given that  
446 multimorbidity is, by nature, heterogenous and context-specific, the collaborator group was  
447 nonetheless optimistic about folding the multiple perspectives represented at the workshop into  
448 a broadly shared frame of reference to facilitate cross-disciplinary working. Following theme

449 2, it was proposed a focus on common consequences of multimorbidity and associated needs  
450 for PLWMM could be one pathway towards conceptual alignment. In the final session of the  
451 workshop, a working definition was proposed as: “A clustering of *needs* [added emphasis] and  
452 conditions that need to be addressed holistically, rather than in isolation”. Whilst only a starting  
453 point, it did draw together major points of agreement during the workshop: the foregrounding  
454 of clusters of needs rather than just medical conditions; the importance of a holistic purview;  
455 and the critique of compartmentalised approaches. Refining this concept was highlighted as a  
456 key aim moving forward.

457

### Box 3. Illustrative excerpts and quotes

458

a. “There is no one-size-fits-all concept or framing of multimorbidity – context matters” (Session 5, group 1, flip chart)

459

b. “Some flexibility / ambiguity in definition – or multiple definitions – may be needed” (Session 5, plenary discussion, Word document on shared screen)

460

c. “For academics, policymakers, and public health, the label or definition of multimorbidity is likely to be useful, whereas, for patients, wellbeing and function are more important” (Session 1, group 1, rapporteur notes)

461

462

d. “Well-defined concepts are useful in academia. The label [of multimorbidity] is useful for prevalence/mapping clusters, being able to study interactions between drugs and conditions” (Session 1, group 1, rapporteur notes)

463

464

e. “You can’t do multimorbidity and focus only on medical conditions, there are a lot of things are going on – social, financial, medical. These factors work together and need to be addressed together, including clinical interventions, upstream solutions, downstream solutions, and community interventions.” (Session 4, ignition talk, rapporteur notes)

465

466

f. “It is important to distinguish the medical framework and the patient model. Biomedical and societal framings of symptoms translate poorly into lay terminology – there is not necessarily a term for multimorbidity” (Session 5, plenary discussion, Word document on shared screen)

467

468

g. “Part of the ‘art’ of multimorbidity may be centring diseases, people, and systems at different times and in different places and situations” (Session 5, group 1, rapporteur notes)

469

470

## 471 Discussion

472 Thematic analysis of workshop proceedings revealed three core themes that are pertinent to the  
473 conceptualisation of multimorbidity in Africa: the disease-centricity of current definitions; the

474 need to foreground what matters to PLWMM; and the importance of conceptual breadth and  
475 flexibility. Building on this framework, in the following, we place these core themes into  
476 conversation with current global health scholarship on multimorbidity, thereby developing an  
477 expanded model of multimorbidity that can underpin a coordinated but context-specific  
478 response to multimorbidity in Africa.

479

480 Our criticism of dominant constructions of multimorbidity emergent from Theme 1 resonates  
481 with several recent commentaries, reviews, and analyses. These have, in different ways, argued  
482 that a disease-centred framing of multimorbidity promotes a static, additive rendering of  
483 disease that treats illness as the sum of its parts.(16,20,29) One consequence of this disease-  
484 centred framing, as Blarikom et al.(16) have argued, is that the multimorbidity conversation  
485 has become preoccupied (and indeed, largely paralysed) by the search for standard biomedical  
486 definition and common core of conditions. Such a definition may be useful for drawing  
487 comparisons between populations and for identifying areas of met and unmet need. However,  
488 it may perpetuate a focus on diseases and individual behaviour and therefore ultimately fail to  
489 harness the critical potentials of multimorbidity to move beyond the single disease  
490 paradigm.(16,20,29) Against this backdrop, it is significant that attempts to adapt – and as one  
491 article puts it, “decolonise”(30) – multimorbidity for use beyond HICs highlight the need to  
492 move from a focus on diseases associated with ageing to recognise the ‘colliding epidemics’  
493 of communicable and NCDs that characterise multimorbidity in LMICs.(3) While this may  
494 have important implications for integrating care across historically separated disease domains,  
495 the workshop proceedings suggest that ‘decolonising’ multimorbidity means more than  
496 adjusting its constituent diseases. Rather, beginning to decolonise the multimorbidity  
497 conversation means moving away from models of research and care that define and categorise  
498 people by their diseases.

499

500 The workshop concluded (as summarised in Theme 2) that there is a need to broaden our focus  
501 from the diseases that sit within multimorbidity to foreground what really matters to PLWMM  
502 in context. Calls for more holistic approaches resound in the multimorbidity literature from  
503 both HICs and LMICs and align with theoretical perspectives from multiple disciplines. This  
504 includes eco-social theory from epidemiology;(31) the syndemic framework,(32,33) the theory  
505 of recursive cascades(34) and burden of treatment theory(13) from the social sciences, and  
506 novel applications of complexity theory to multimorbidity within the primary care  
507 sciences.(29) Despite this wealth of theory and the recent proliferation of person-centred  
508 chronic care models,(14,35) in practice attempts to integrate care have not proven to be  
509 especially ‘person-centred’ in practice. Currently advocated-for person-centred care models  
510 are still generally designed using vertical disease programmes, for instance South Africa’s  
511 Integrated Chronic Disease Management (ICDM) system modelled on the country’s HIV  
512 programme.(15,36) Moreover, the common aim of such programmes to ‘activate’ PLWMM’s  
513 agency for better health decision-making emphasise individual responsibility, but often fail to  
514 respond to high rates of poverty and inequality that compromise the ability of PLWMM to  
515 control their exposure to health risks. A growing number of qualitative studies reporting  
516 PLWMM’s perspectives have been reported from countries including Malawi,(13) Ghana(37),  
517 Ethiopia,(38) and South Africa.(39) These show that PLWMM are unable to take control over  
518 their own health if they experience a ‘lack’ of health services, information, and basic  
519 necessities. Such lack in turn feeds into a cycle of precariousness that negatively impacts  
520 people’s ability to cope, often sending them down a slippery slope – or in complexity theory  
521 terms, over ‘tipping points’(29) – towards further disability and decline. Also appealed to but  
522 rarely prioritised in practice is the active involvement of caregivers and support networks in  
523 the provision of care for PLWMM.(15,40) Here, African social network theories such as

524 Ubuntu – promoting mutual caring through compassion, reciprocity, dignity, and humanity –  
525 could be a useful concept, as they potentially cultivate resilience by creating a shared identity  
526 between PLWMM and carers, allowing them to flourish even when living in precarity.(40)  
527 Starting from where PLWMM are now – their priorities, values, needs, burden, and challenges  
528 navigating current healthcare systems – is a more promising way into the development of  
529 genuinely person-centred care models than the current retrospective ‘integration’ of different  
530 disease programmes. While an elaboration of what this might entail in practice is beyond the  
531 scope of this article, it would undoubtedly require careful reconsideration of what, where, how,  
532 and by whom care is delivered, likely involving the decentralisation of chronic care through  
533 healthcare workers trained in holistic, community-based care models – as elaborated, for  
534 instance, within the syndemic care framework.(33,41)

535

536 The main conclusion from Theme 3 was the need for a broad, flexible understanding of  
537 multimorbidity for it to be genuinely cross-cutting, folding in the possibility that in some  
538 scenarios it may not be so useful at all. This conclusion aligns with a growing body of  
539 multimorbidity scholarship running against the grain of the dominant drive to standardise and  
540 harmonise a biomedically-defined multimorbidity concept. A recent workshop exploring  
541 lessons from South Africa notably concluded that the ‘minimalist’ definition of multimorbidity  
542 as two or more chronic conditions, while appealing for its simplicity, is too simple. Any  
543 definition, it was argued, needs to take into consideration the causes and consequences of  
544 multimorbidity and will need to remain flexible enough to be responsive to different research  
545 questions, (inter-)disciplinary contexts, and scenarios.(42) Building on these observations, our  
546 findings suggest that a focus on common consequences for PLWMM holds particular promise  
547 for bringing different perspectives together around a common frame of reference. If, indeed,  
548 the needs and treatment burdens of PLWMM are often not disease specific, such a disease-

549 agnostic focus could bring together disciplines and specialities in a way that has eluded the  
550 abstract and seemingly irresolvable attempts to pin down multimorbidity and its causal  
551 pathways in pathophysiological terms. The broader point, perhaps, is that the distinction  
552 between causes and consequences itself begins to break down once we recentre what matters  
553 to PLWMM, from whose perspective ‘consequences’ of a living with MM today may be  
554 ‘causes’ of further problems tomorrow.(34) By centring PLWMM and their ability to lead  
555 healthy, fulfilling and independent lives, we may better align medical and lay models of  
556 multimorbidity, such that it may not only be more cross-cutting and useful but also, perhaps,  
557 carry fewer negative connotations as a label. Figure 2 presents an expanded model of  
558 multimorbidity that folds in Themes 1, 2 and 3.

559

560 [Insert Figure 2]

561

562 **Figure 2. An expanded conceptual model of multimorbidity**

563

564 This model draws on the multiple theoretical influences of the participant group, including the  
565 syndemics framework,(32,33) burden of treatment theory,(13) and complexity theory.(29) It  
566 retains within it the basic idea of multimorbidity as involving more than one primary condition,  
567 in recognition of the utility of diagnostic categories within public health, epidemiology, and  
568 clinical medicine. But it remains agnostic about which kinds and combinations of condition  
569 ‘count’ as multimorbidity, instead expanding and bringing into the foreground the  
570 consequences of multimorbidity and its distributed burden on PLWMM, families, social  
571 networks, health providers, and the healthcare system. The model highlights factors identified  
572 by the collaborator group that currently overwhelmingly pull towards the right of the model,  
573 that is, that set PLWMM on a slippery (but not inevitable or linear) slope towards secondary



574 complications and potentially catastrophic burdens that are felt across the system. It also casts  
575 our attention to the factors that might pull back people towards the left of the model. This  
576 includes seemingly small changes to a person's circumstances that may make multimorbidity  
577 more manageable for the person affected and their wider networks, even in cases of advanced  
578 or complex disease. Given that many secondary complications cannot be reversed, the model  
579 suggests the emphasis should be on primary and secondary prevention. More than  
580 pharmacological or lifestyle interventions, this demands and rather interventions that take into  
581 account the interdependency between PLWMM and family, social network, healthcare  
582 providers, the health system, and wider social, structural, and environmental context.

583

584 While the 'maximalist' orientation of this multimorbidity model may lack some of the appeals  
585 of a minimalist definition, its dynamic and multidimensional nature enables different questions  
586 and disciplinary perspectives to be brought to bear on multimorbidity, including more refined  
587 definitions suited for specific questions. At the same time, the model suggests an overarching  
588 shift in the kinds of question that we ask and how we answer them. First, a focus on the complex  
589 bio-social interactions and impacts of multimorbidity moves us away from the disease-centred,  
590 cross-sectional designs from which most knowledge about multimorbidity to date originates  
591 (and that have tended to favour pharmacological and behavioural interventions) to disease-  
592 agnostic, richly contextual cohort research designs focused on burden, outcomes, and quality  
593 of life across the life course. Second, recognition of the multilevel factors at play implies that  
594 multimorbidity cannot be fully appreciated through any one disciplinary lens alone. Inter- and  
595 trans-disciplinary approaches, as well as holistic stakeholder engagement are needed to  
596 understand how biological, socio-cultural, political, economic, and environmental factors  
597 intertwine to co-produce multimorbidity; as well as to design holistic, person-centred, and  
598 systems-directed interventions. Third, the model implies a more context-specific approach to

599 decide which disciplines and fields of expertise are relevant within the multimorbidity arena.  
600 Multimorbidity may result in similar needs and treatment burdens across different condition  
601 clusters, but its manifestation may also vary considerably across African settings given the  
602 tremendous heterogeneity of social, structural, environmental, and health system contexts.  
603 Thus, the knowledge bases and skillsets required to understand and address multimorbidity  
604 need to be similarly adaptive.(36) Whilst challenging, this is precisely the kind of context-  
605 sensitive approach that multimorbidity compels, offering a more promising pathway towards  
606 holistic person-centred care than universal, disease-centred interventions.

607

608 This model and the approach underlying it have several strengths. This was the first workshop  
609 to systematically bring together a multidisciplinary group of academic and applied actors to  
610 critically consider the meaning and utility of multimorbidity specifically within African  
611 settings. This was a bold exercise, not only in multidisciplinary experimentation,(23) but in  
612 elevating perspectives from a range of African contexts to reframe the multimorbidity  
613 conversation. This work provides a conceptual infrastructure to undergird the North-South and,  
614 more importantly, South-South partnerships that have been explicitly recognised as necessary  
615 for responding to multimorbidity in the region.(7) This research also had several limitations.  
616 First, while the collaborator group advocated for a person-centred perspective on  
617 multimorbidity, we were unable to directly include the voices of PLWMM. Further research is  
618 needed to gauge the extent to which this model resonates with PLWMM, whose perspectives  
619 remain under-represented within the multimorbidity conversation in Africa. The collaborator  
620 group was also biased towards Southern Africa, with the largest representation of expertise  
621 from Malawi, Zimbabwe, and South Africa, and thus our work disproportionately reflects  
622 views from these countries. Finally, our thematic analysis may be biased towards the views of  
623 the core working group. Whilst we endeavoured to represent the wider group's perspectives

624 objectively through a rigorous thematic analysis of workshop proceedings, the fact that we  
625 were both participants (in the workshop) and observers (analysing proceedings) means that the  
626 model may be biased towards our own values and viewpoints.

627

## 628 **Conclusion**

629 In this article, we have analysed focus-and whole-group discussions from a workshop on  
630 multimorbidity in African contexts, placed emergent themes into conversation with current  
631 thinking on multimorbidity, and developed an expanded model based on the groups' common  
632 commitments. While recognising the crucial research that has preceded our work, we believe  
633 in the necessity of providing nuance to the available framings of multimorbidity, stressing the  
634 importance of understanding the lived experiences of people and their networks, and adding in  
635 the socio-economic complexities that impact PLWMM, providers, and the development of  
636 systems. Further conceptual and empirical work is needed to draw out the implications of this  
637 conceptual model for the heterogenous and multifaceted health systems in Africa. Also open  
638 for the test of empirical scrutiny is whether it will prove useful for orienting and mapping  
639 different strands of multimorbidity work across disciplines, projects, and interventions, and for  
640 contributing to an overall more joined-up response moving forward.

641

## 642 **Acknowledgements**

643 We are greatly indebted to members of the Africa Multimorbidity Alliance who took part in  
644 the concept-building workshop on which this article is based. We are grateful to the  
645 administrators and technicians at the Malawi-Liverpool-Wellcome Programme for their efforts  
646 in preparing and running the workshop on which this article is based, with particular thanks to  
647 Kate Mangulama. We finally wish to express gratitude to the many funders and institutions  
648 who supported the travel and attendance of participants.

649

## 650 **Funding statement**

651 This workshop on which this research was based was funded by the National Institute of Health  
652 and Care Research [Multilink Consortium, grant ref. NIHR201708, and the NIHR Leicester  
653 Biomedical Research Centre (BRC)], The Wellcome Trust [Multimorbidity and Knowledge  
654 Architectures: An Interdisciplinary Global Health Collaboration, grant ref. 222177] and the  
655 Department of Respiratory Sciences, University of Leicester, UK, supported by the British  
656 Academy and Global Challenges Research Fund [grant ref. GCRFNGR5\1242].

657

## 658 **References**

- 659 1. The Lancet. Making more of multimorbidity: an emerging priority. The Lancet.  
660 2018;391(10131):1637.
- 661 2. The Academy of Medical Sciences. Multimorbidity: a priority for global health  
662 research. 2018;(April). Available from: <https://acmedsci.ac.uk/file-download/82222577>
- 663 3. Basto-Abreu A, Barrientos-Gutierrez T, Wade AN, Melo DO De, Souza ASS De,  
664 Nunes BP. Multimorbidity matters in low and middle-income countries. Journal of  
665 Multimorbidity and Comorbidity. 2022;12:1–10.
- 666 4. Skou ST, Mair FS, Fortin M, Guthrie B, Nunes BP, Miranda JJ, et al. Multimorbidity.  
667 Nat Rev Dis Primers. 2022;8(1): 48.
- 668 5. PLOS Medicine Editors. Multimorbidity: Addressing the next global pandemic. 2023.  
669 20: e1004229.
- 670 6. Peer N, de Villiers A, Jonathan D, Kalombo C, Kengne AP. Care and management of  
671 a double burden of chronic diseases: Experiences of patients and perceptions of their healthcare  
672 providers. PLoS One. 1;15.

- 673 7. Academy of Medical Sciences, Academy of Science of South Africa. Improving the  
674 prevention and management of multimorbidity in sub-Saharan Africa Workshop report. 2019.  
675 Available from: <https://acmedsci.ac.uk/file-download/22652130>
- 676 8. Oni T, Youngblood E, Boulle A, McGrath N, Wilkinson RJ, Levitt NS. Patterns of  
677 HIV, TB, and non-communicable disease multi-morbidity in peri-urban South Africa- a cross  
678 sectional study. *BMC Infect Dis.* 2015;15(1).
- 679 9. Tamuhla T, Dave JA, Raubenheimer P, Tiffin N. Diabetes in a TB and HIV-endemic  
680 South African population: Analysis of a virtual cohort using routine health data. *PLoS One.*  
681 2021;16(5): e0251303.
- 682 10. Chowdhury SR, Chandra Das D, Sunna TC, Beyene J, Hossain A. Global and regional  
683 prevalence of multimorbidity in the adult population in community settings: a systematic  
684 review and meta-analysis. *EClinicalMedicine.* 2023;57: 101860.
- 685 11. Mendenhall E, Kim AW, Panasci A, Cele L, Mpondo F, Bosire EN, et al. A mixed-  
686 methods, population-based study of a syndemic in Soweto, South Africa. *Nat Hum Behav.*  
687 2022;6(1):64–73.
- 688 12. Alkhatib A, Nnyanzi LA, Mujuni B, Amany G, Ibingira C. Preventing multimorbidity  
689 with lifestyle interventions in sub-Saharan Africa: A new challenge for public health in low  
690 and middle-income countries. *International Journal of Environmental Research and Public*  
691 *Health.* 2021; 18: 12449
- 692 13. Chikumbu EF, Bunn C, Kasenda S, Dube A, Phiri-Makwakwa E, Jani BD, et al.  
693 Experiences of multimorbidity in urban and rural Malawi: An interview study of burdens of  
694 treatment and lack of treatment. *PLOS Global Public Health.* 2022;2(3):e0000139.

- 695 14. Oni T, McGrath N, BeLue R, Roderick P, Colagiuri S, May CR, et al. Chronic diseases  
696 and multi-morbidity - A conceptual modification to the WHO ICCC model for countries in  
697 health transition. *BMC Public Health*. 2014;14(1):1–7.
- 698 15. Bosire N Edna, Mendenhall Emily, Norris A Shane GJ. Patient-Centred Care for  
699 Patients With Diabetes and HIV at a Public Tertiary Hospital in South Africa: An Ethnographic  
700 Study. *Int J Health Policy Manag*. 2021;10(9):1–12.
- 701 16. Blarikom E Van, Fudge N, Swinglehurst D. The emergence of multimorbidity as a  
702 matter of concern : a critical review. *Biosocieties*. 2023;18:614–631
- 703 17. Diederichs C, Berger K, Bartels DB. The measurement of multiple chronic diseases -  
704 A systematic review on existing multimorbidity indices. *J Gerontol A Biol Sci Med Sci*.  
705 2022;66(3): 301-11.
- 706 18. Ho ISS, Azcoaga-Lorenzo A, Akbari A, Black C, Davies J, Hodgins P, et al. Examining  
707 variation in the measurement of multimorbidity in research: a systematic review of 566 studies.  
708 *Lancet Public Health*. 2021;6(8): e587–97.
- 709 19. Lefèvre T, d’Ivernois JF, De Andrade V, Crozet C, Lombrail P, Gagnayre R. What do  
710 we mean by multimorbidity? An analysis of the literature on multimorbidity measures,  
711 associated factors, and impact on health services organization. *Rev Epidemiol Sante Publique*.  
712 2014;62(5): 305–14.
- 713 20. Lynch R, Hanckel B, Green J. The (failed) promise of multimorbidity: chronicity,  
714 biomedical categories, and public health. *Crit Public Health*. 2021;32(4): 450–61
- 715 21. Charmaz K. *Constructing grounded theory: A practical guide through qualitative*  
716 *research*. London: Sage; 2006.

- 717 22. Banda GT, Bosire E, Bunn C, Chandler CIR, Chikumbu E, Chiwanda J, et al.  
718 Multimorbidity research in Sub-Saharan Africa: Proceedings of an interdisciplinary workshop.  
719 Wellcome Open Res. 2023;8:110.
- 720 23. Balmer AS, Calvert J, Marris C, Molyneux-Hodgson S, Frow E, Kearnes M, et al.  
721 Taking Roles in Interdisciplinary Collaborations: Reflections on Working in Post-ELSI Spaces  
722 in the UK Synthetic Biology Community. *Science & Technology Studies*. 2015;28(3):3–25.
- 723 24. Greenhough B, Read CJ, Lorimer J, Lezaun J, McLeod C, Benezra A, et al. Setting the  
724 agenda for social science research on the human microbiome. *Palgrave Commun*. 2020;6(1):1–  
725 11.
- 726 25. Mendenhall E, Weaver LJ. Socially Determined? Frameworks for Thinking about  
727 Health Equity and Wellness. In: Page-Reeves J, editor. *Well-Being as a Multidimensional*  
728 *Concept: Understanding Connections Between Culture, Community, and Health*. Lexington  
729 Books of Rowman & Littlefield; 2021. p. 450.
- 730 26. Morton B, Vercueil A, Masekela R, Heinz E, Reimer L, Saleh S, et al. Consensus  
731 statement on measures to promote equitable authorship in the publication of research from  
732 international partnerships. *Anaesthesia*. 2022; 77: 243–7.
- 733 27. Cascio MA, Lee E, Vaudrin N, Freedman DA. A Team-based Approach to Open  
734 Coding: Considerations for Creating Intercoder Consensus. *Field methods*. 2019;31(2): 116–  
735 30.
- 736 28. Sutherland WJ, Fleishman E, Mascia MB, Pretty J, Rudd MA. Methods for  
737 collaboratively identifying research priorities and emerging issues in science and policy.  
738 *Methods in Ecology and Evolution*. 2011;2: 238–47.

- 739 29. Sturmberg JP, Getz LO, Stange KC, Upshur REG, Mercer SW. Beyond multimorbidity:  
740 What can we learn from complexity science? *J Eval Clin Pract.* 2022;27(5):1187–93.
- 741 30. Roomaney RA, Van Wyk B, Wyk VP Van. Decolonising multimorbidity? research  
742 gaps in low and middle-income countries. *Pan African Medical Journal.* 2022;41(140).
- 743 31. Krieger N. Theories for social epidemiology in the 21st century: an ecosocial  
744 perspective. *Int J Epidemiol.* 2001;30:668–77.
- 745 32. Singer M, Bulled N, Ostrach B, Mendenhall E. Syndemics and the biosocial conception  
746 of health. *The Lancet.* 2017;389(10072):941–50.
- 747 33. Mendenhall E, Kohrt BA, Norris SA, Ndeti D, Prabhakaran D. Non-communicable  
748 disease syndemics: poverty, depression, and diabetes among low-income populations. *The*  
749 *Lancet.* 2017;389(10072):951–63.
- 750 34. Manderson L, Warren N. “Just One Thing after Another”: Recursive Cascades and  
751 Chronic Conditions. *Med Anthropol Q.* 2016;30(4):479–97.
- 752 35. South Africa DOH. Integrated Chronic Disease Management Manual. 2011. Available  
753 from: [https://knowledgehub.health.gov.za/system/files/elibdownloads/2023-04/Integrated-](https://knowledgehub.health.gov.za/system/files/elibdownloads/2023-04/Integrated-chronic-disease-management-manual.pdf)  
754 [chronic-disease-management-manual.pdf](https://knowledgehub.health.gov.za/system/files/elibdownloads/2023-04/Integrated-chronic-disease-management-manual.pdf)
- 755 36. Dixon et al. Making Morbidity Multiple: History, Legacies, and Possibilities for Global  
756 Health. *Journal of Multimorbidity and Comorbidity.* 2023; 13:1-12.
- 757 37. Morgan SA, Eyles C, Roderick PJ, Adongo PB, Hill AG. Women living with multi-  
758 morbidity in the Greater Accra Region of Ghana: A qualitative study guided by the Cumulative  
759 Complexity Model. *J Biosoc Sci.* 2019 Jul 1;51(4):562–77.



- 760 38. Eyowas FA, Schneider M, Alemu S, Getahun FA. Experience of living with  
761 multimorbidity and health workers perspectives on the organization of health services for  
762 people living with multiple chronic conditions in Bahir Dar, northwest Ethiopia: a qualitative  
763 study. BMC Health Serv Res. 2023 Dec 1;23(1).
- 764 39. Matima R, Murphy K, Levitt NS, BeLue R, Oni T. A qualitative study on the  
765 experiences and perspectives of public sector patients in Cape Town in managing the workload  
766 of demands of HIV and type 2 diabetes multimorbidity. PLoS One. 2018;13(3):1–19.
- 767 40. Mbokazi N, van Pinxteren M, Murphy K, Mair FS, May CR, Levitt NS. Ubuntu as a  
768 mediator in coping with multimorbidity treatment burden in a disadvantaged rural and urban  
769 setting in South Africa. Soc Sci Med. 2023 Oct;334:116190.
- 770 41. Dixon J, Mendenhall E. Syndemic thinking to address multimorbidity and its structural  
771 determinants. Nature Reviews Disease Primers. Nature Research; 2023;9.
- 772 42. Academy of Science of South Africa, The Academy of Medical Sciences. Addressing  
773 the global challenges of multimorbidity – lessons from South Africa. 2016. Available from:  
774 [https://acmedsci.ac.uk/file-](https://acmedsci.ac.uk/file-download/3855485#:~:text=In%20recognition%20of%20the%20growing%20challenge%20posed%20by,of%20multimorbidity%20in%20a%20middle-income%20country%20%28South%20Africa%29.6)  
775 [download/3855485#:~:text=In%20recognition%20of%20the%20growing%20challenge%20p](https://acmedsci.ac.uk/file-download/3855485#:~:text=In%20recognition%20of%20the%20growing%20challenge%20posed%20by,of%20multimorbidity%20in%20a%20middle-income%20country%20%28South%20Africa%29.6)  
776 [osed%20by,of%20multimorbidity%20in%20a%20middle-](https://acmedsci.ac.uk/file-download/3855485#:~:text=In%20recognition%20of%20the%20growing%20challenge%20posed%20by,of%20multimorbidity%20in%20a%20middle-income%20country%20%28South%20Africa%29.6)  
777 [income%20country%20%28South%20Africa%29.6](https://acmedsci.ac.uk/file-download/3855485#:~:text=In%20recognition%20of%20the%20growing%20challenge%20posed%20by,of%20multimorbidity%20in%20a%20middle-income%20country%20%28South%20Africa%29.6)

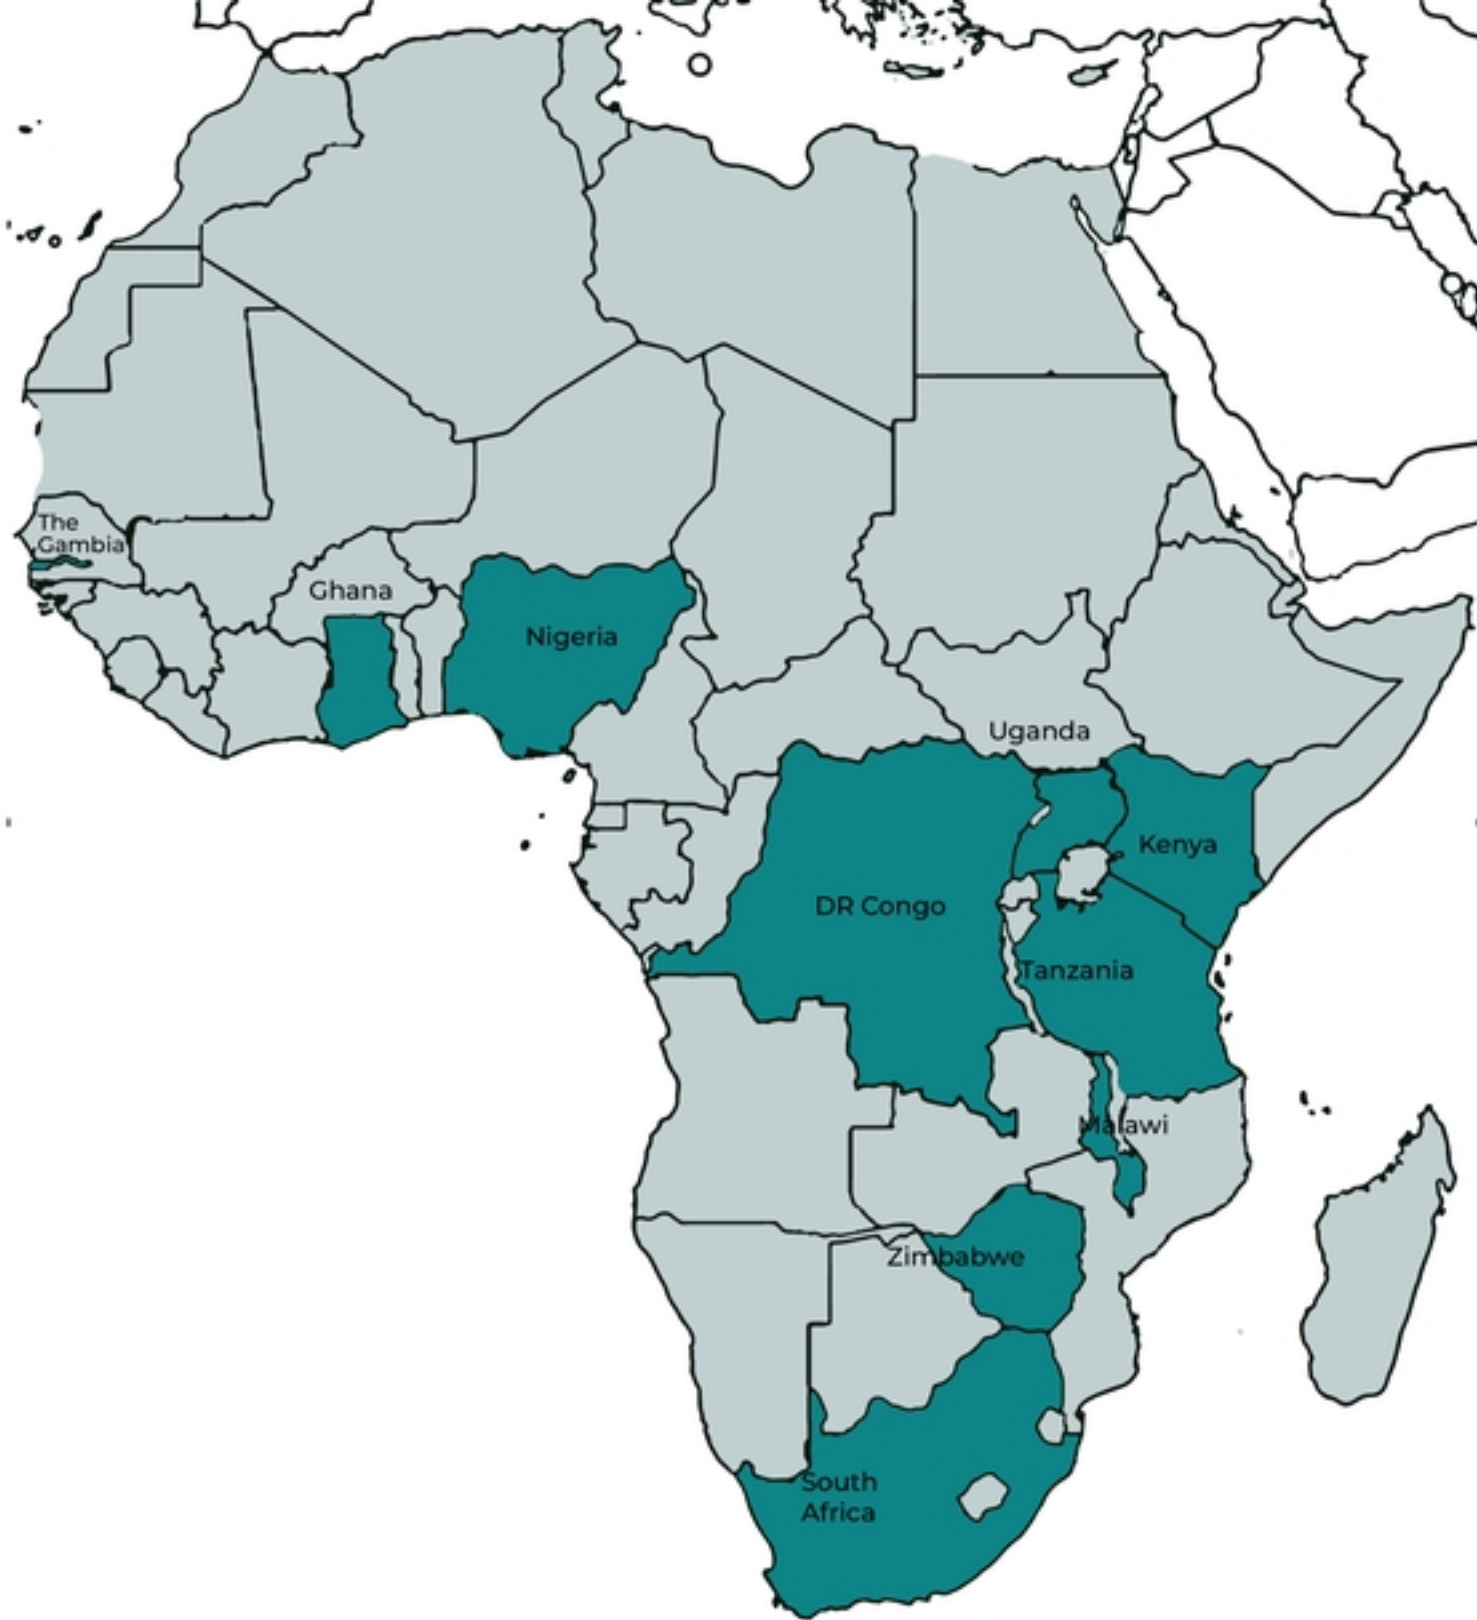

## Disciplines and perspectives

- Epidemiology
- Public health
- Health policy and systems
- Health economics
- Bioinformatics
- General medicine
- Emergency medicine
- Nursing
- Community advocacy
- Geriatrics
- Respiratory medicine
- Endocrinology
- Cardiology
- Rheumatology
- Neurology
- Infectious disease
- Anthropology
- Sociology
- History

Figure 1

## Panel A: Multimorbidity conceptual model

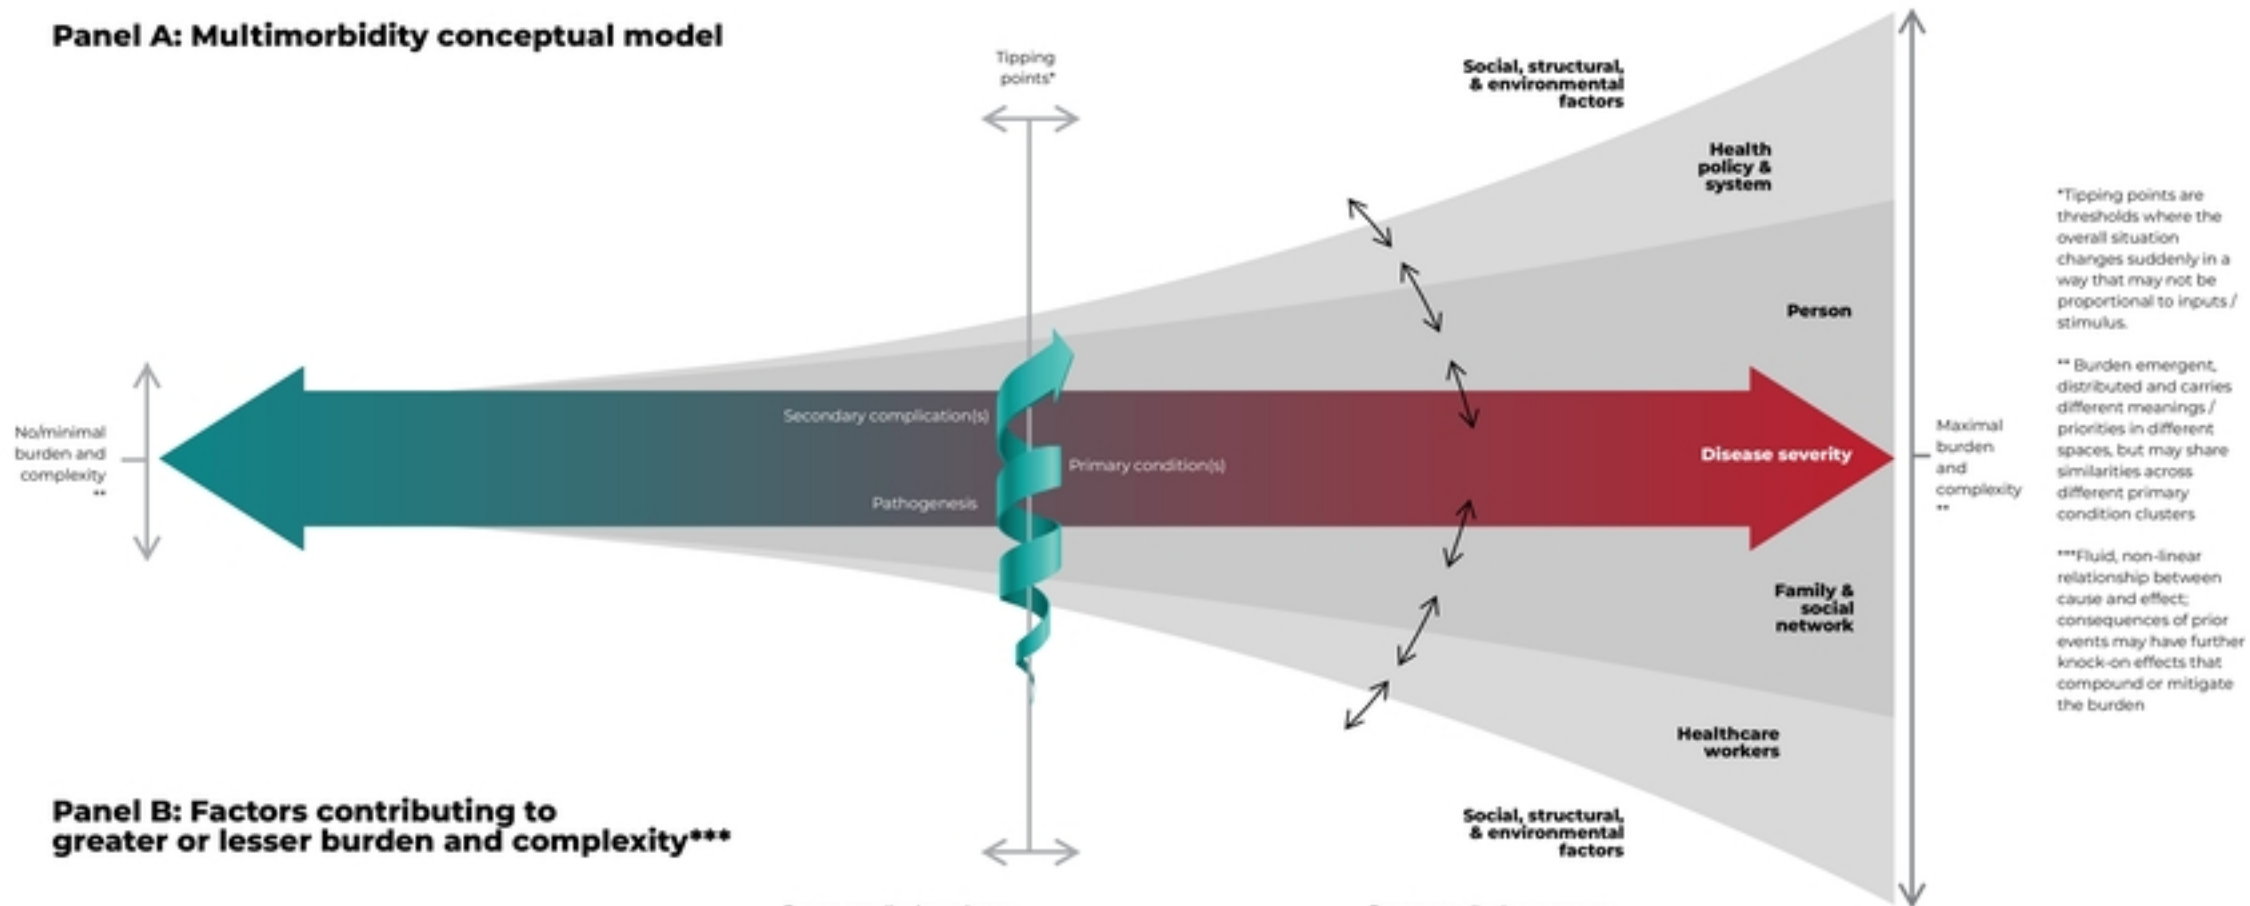

## Panel B: Factors contributing to greater or lesser burden and complexity\*\*\*

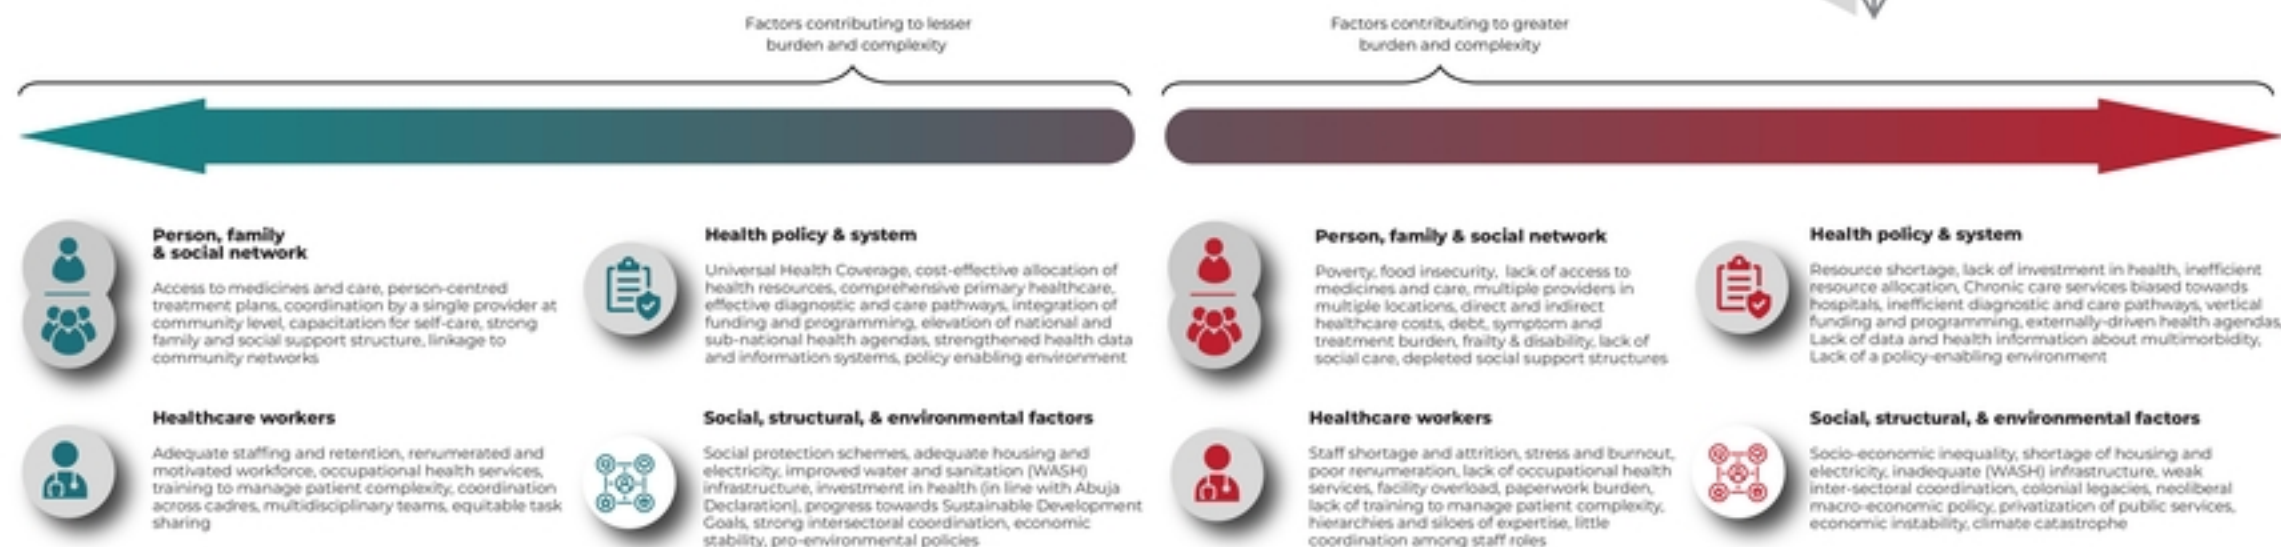

Figure 2
